# Supplementary material for: Deuterium NMR spectroscopy is a versatile and economical tool for monitoring reaction kinetics in ionic liquidsElectronic supplementary information (ESI) available: Figs. S1–6: NMR stack plots and kinetic traces. See http://www.rsc.org/suppdata/cc/b1/b108864e/
Source: Royal Society of Chemistry journal article supplement (doi:10.1039/b108864e), 2001-12-10
Supplement: b108864e.pdf [file b108864e.pdf]

Supporting Information for

**"Deuterium NMR Spectroscopy is a Versatile and  
Economical Tool for Monitoring Reaction Kinetics  
in Ionic Liquids"**

Armando Durazo and Mahdi M. Abu-Omar\*

Chemical Communications

(7 pages total)

Table of Contents

| <b>Fig.</b> | <b>Reaction</b>                                                             | <b>Solvent</b>          |
|-------------|-----------------------------------------------------------------------------|-------------------------|
| S1          | [ D8] Styrene dihydroxylation,<br>[ H <sub>2</sub> O <sub>2</sub> ] = 5.0 M | [ EtPy] BF <sub>4</sub> |
| S2          | [ D8] Styrene epoxidation (UHP)                                             | [ Emim] BF <sub>4</sub> |
| S3          | [ D10] Cyclohexene epoxidation<br>(UHP)                                     | [ Emim] BF <sub>4</sub> |
| S4          | [ D10] Cyclohexene dihydroxylation<br>aq H <sub>2</sub> O <sub>2</sub>      | [ Emim] BF <sub>4</sub> |
| S5          | [ D6] DMSO oxidation, aq H <sub>2</sub> O <sub>2</sub>                      | [ Emim] BF <sub>4</sub> |
| S6          | [ D6] Me <sub>2</sub> S methylation                                         | [ Emim] BF <sub>4</sub> |

All reactions are conducted at 298 K.

All figures include a) NMR stack plot and b)  
kinetic trace.

For more complicated spectra, individual  
resonances are labeled as belonging to :

R = reactant

I = intermediate

P = product

a)

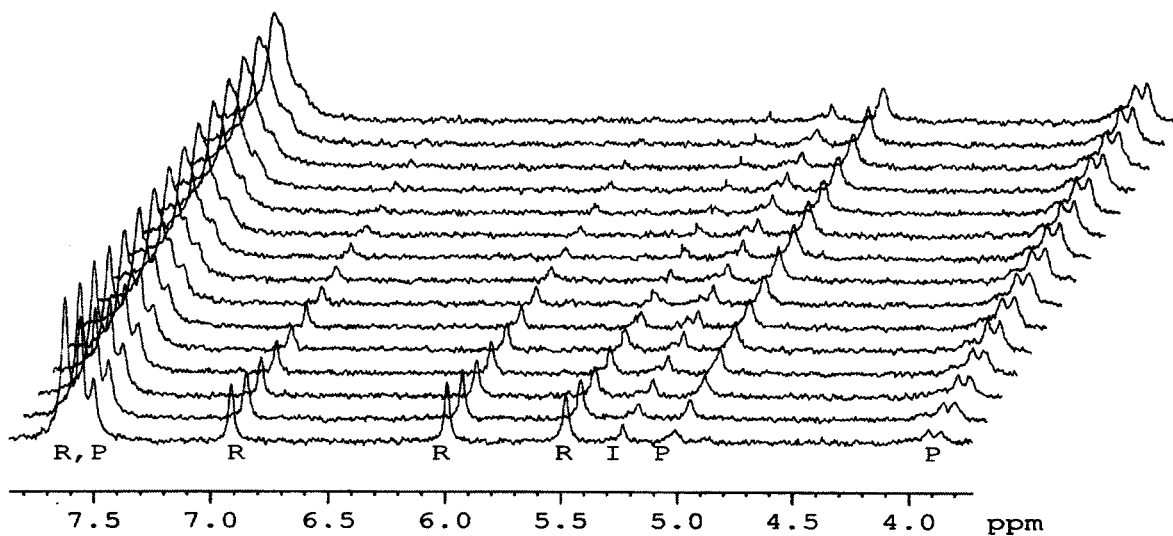

b)

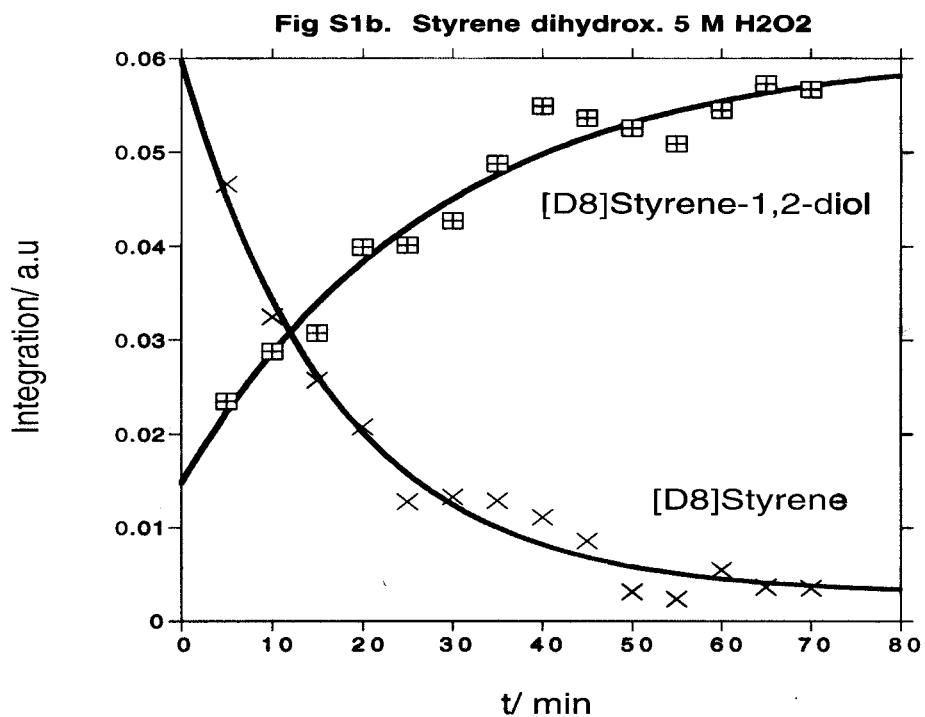

Figure S1. Dihydroxylation of [D8] Styrene. Conditions: [H<sub>2</sub>O<sub>2</sub>] = 5.0 M, [styrene-d<sub>8</sub>] = 0.030 M, [MTO] = 0.0050 M at T = 298 K. 5 min. intervals.

a)

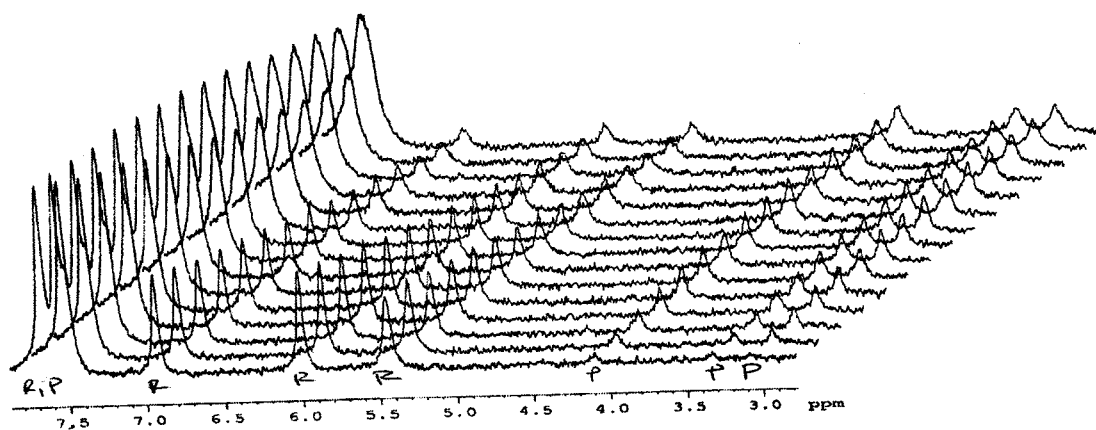

b)

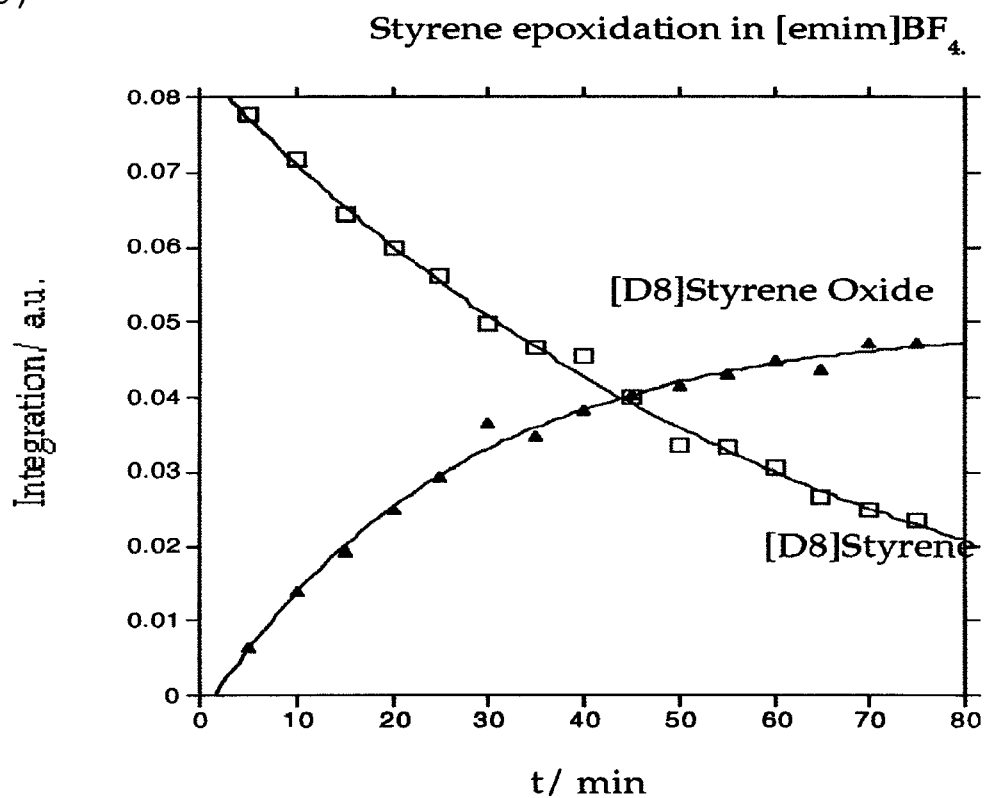

Figure S2. Exoxidation of [D8] Styrene. Conditions:  $[\text{UHP}] = 1.0 \text{ M}$ ,  $[\text{MTO}] = 0.008 \text{ M}$ ,  $[\text{styrene-d8}] = 0.10 \text{ M}$  in  $[\text{Emim}]\text{BF}_4$  at  $T = 298 \text{ K}$ . 5 min intervals.

a)

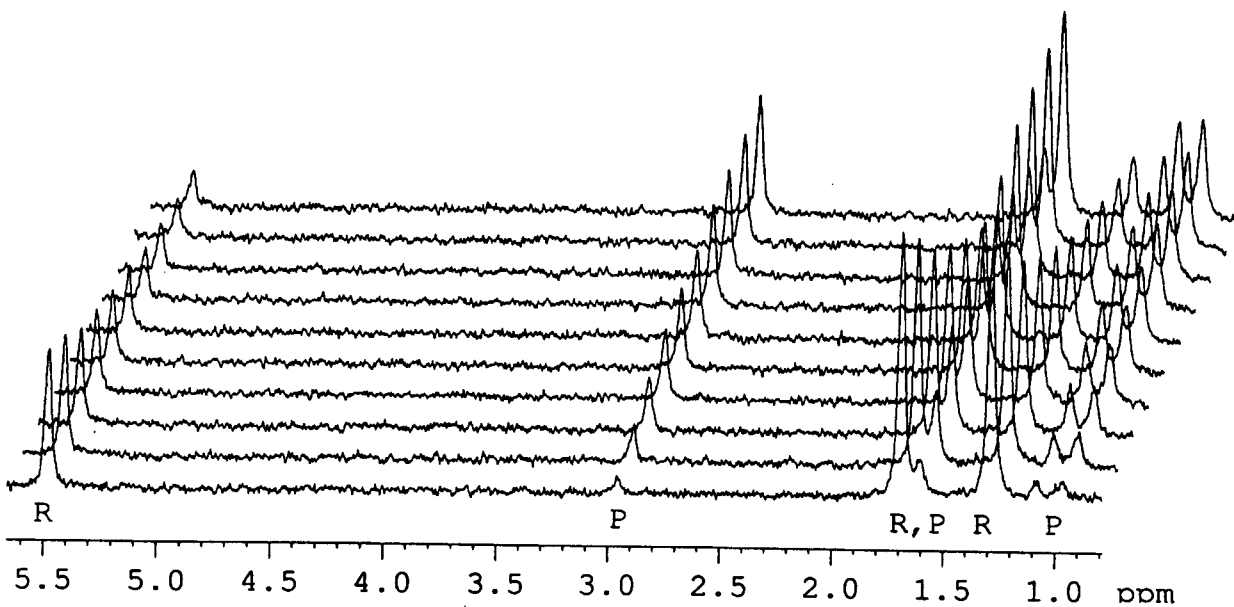

b)

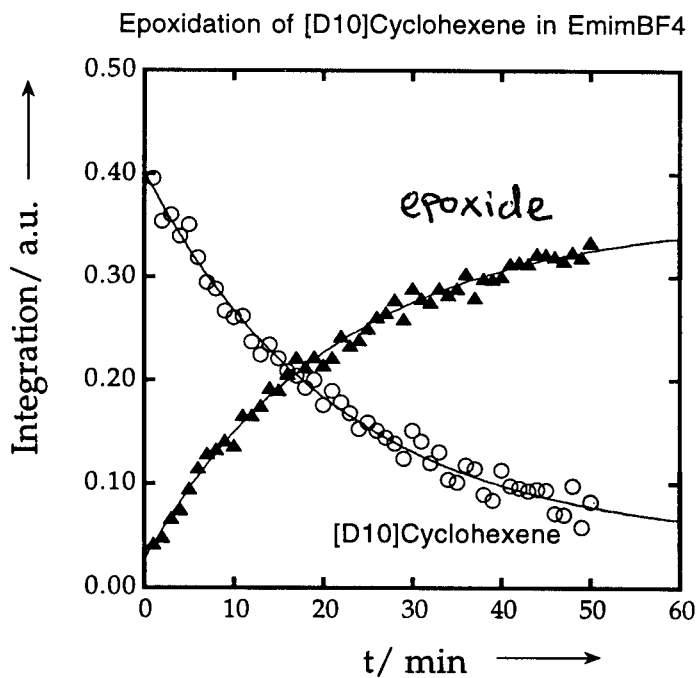

Fig S3. Epoxidation of [D10]Cyclohexene in [Emim]BF<sub>4</sub>, 4 mM MTO, 100 mM cyclohexene, 1 M UHP 298 K.

a)

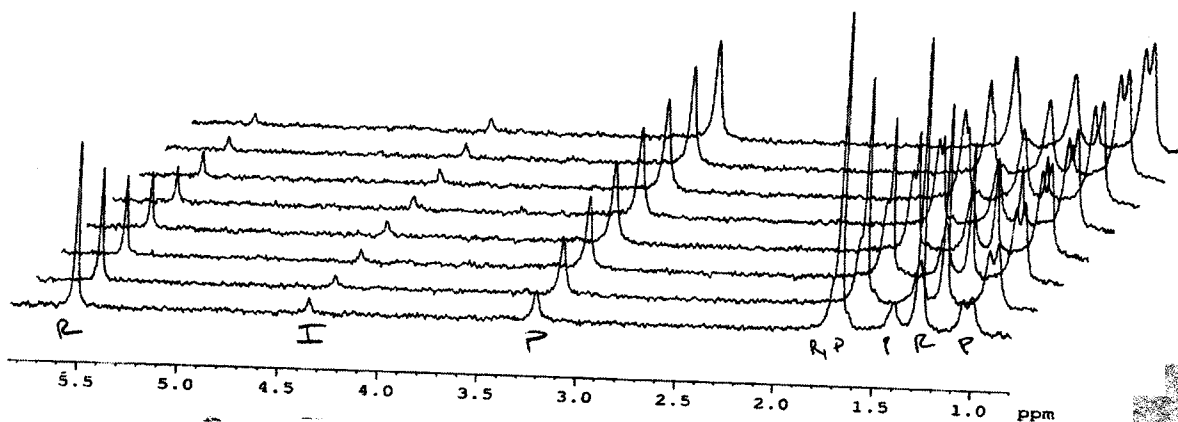

b)

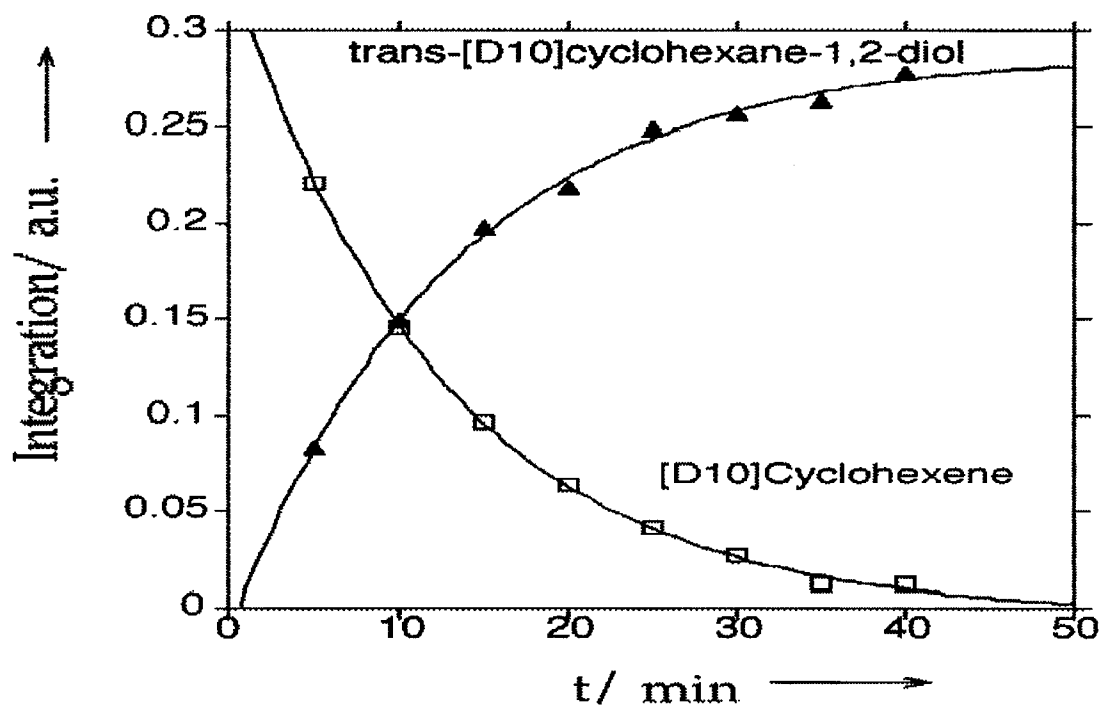

Figure S4. Dihydroxylation of  $[\text{D}_{10}]$  Cyclohexene. Conditions:  $[\text{H}_2\text{O}_2] = 0.50 \text{ M}$ ,  $[\text{MTO}] = 8.0 \times 10^{-4} \text{ M}$ , and  $[\text{cyclohexene-d}_{10}] = 0.10 \text{ M}$  at  $T = 298\text{K}$ . 5 min intervals.

a) spectra shown at 5 minute intervals.

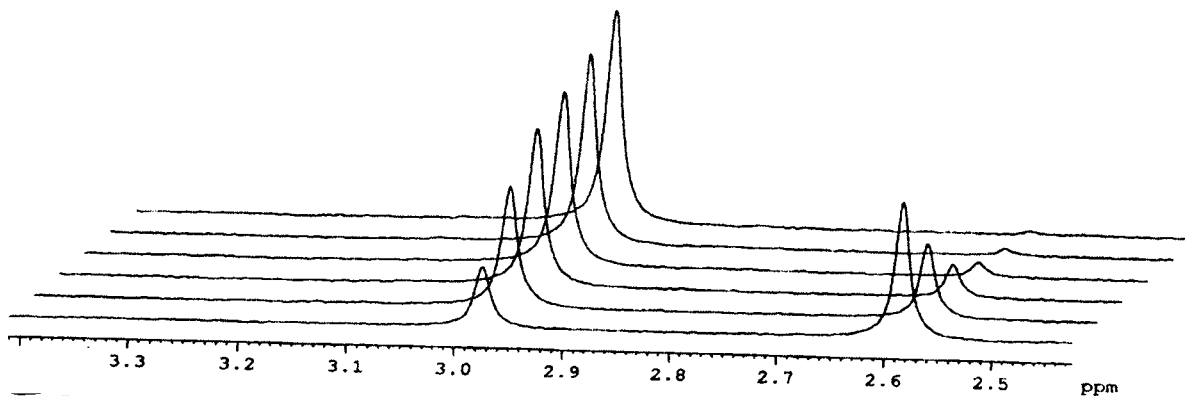

b)

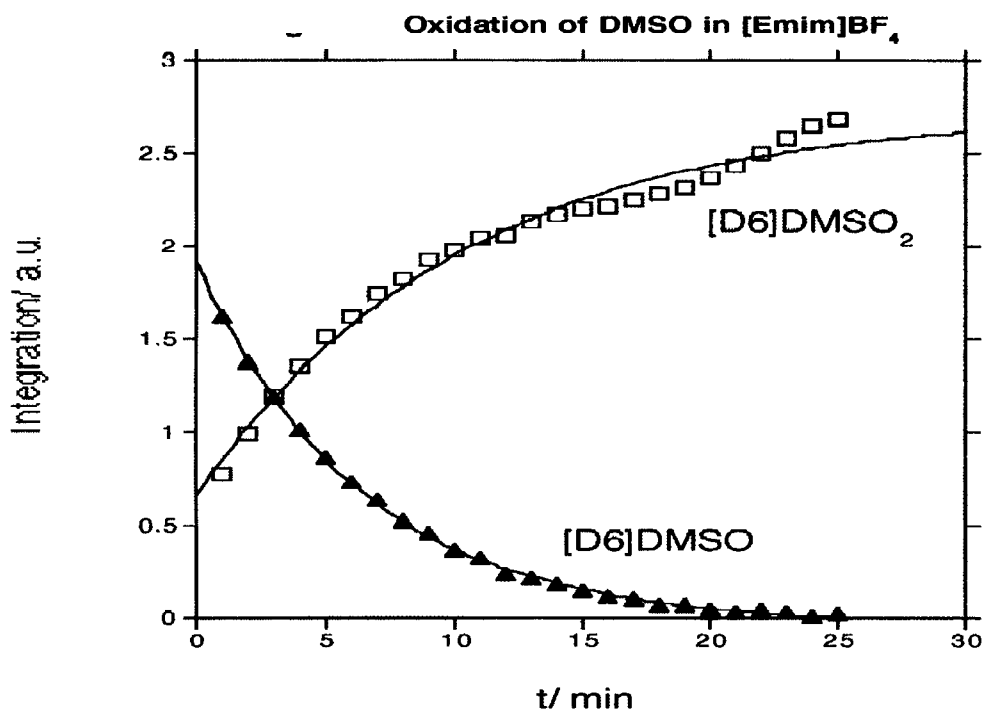

Figure S5. Oxidation of [D6] DMSO in [emim] BF<sub>4</sub>.  
Conditions: [H<sub>2</sub>O<sub>2</sub>] = 1.4 M, [MTO] = 1.0 × 10<sup>-3</sup> M, [DMSO-d6] = 0.142 M at 298K.

a)

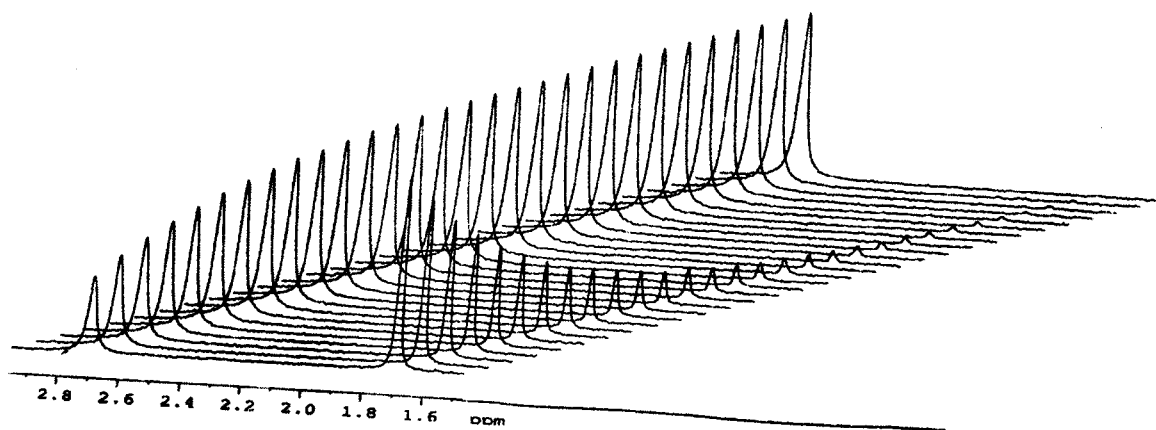

b)

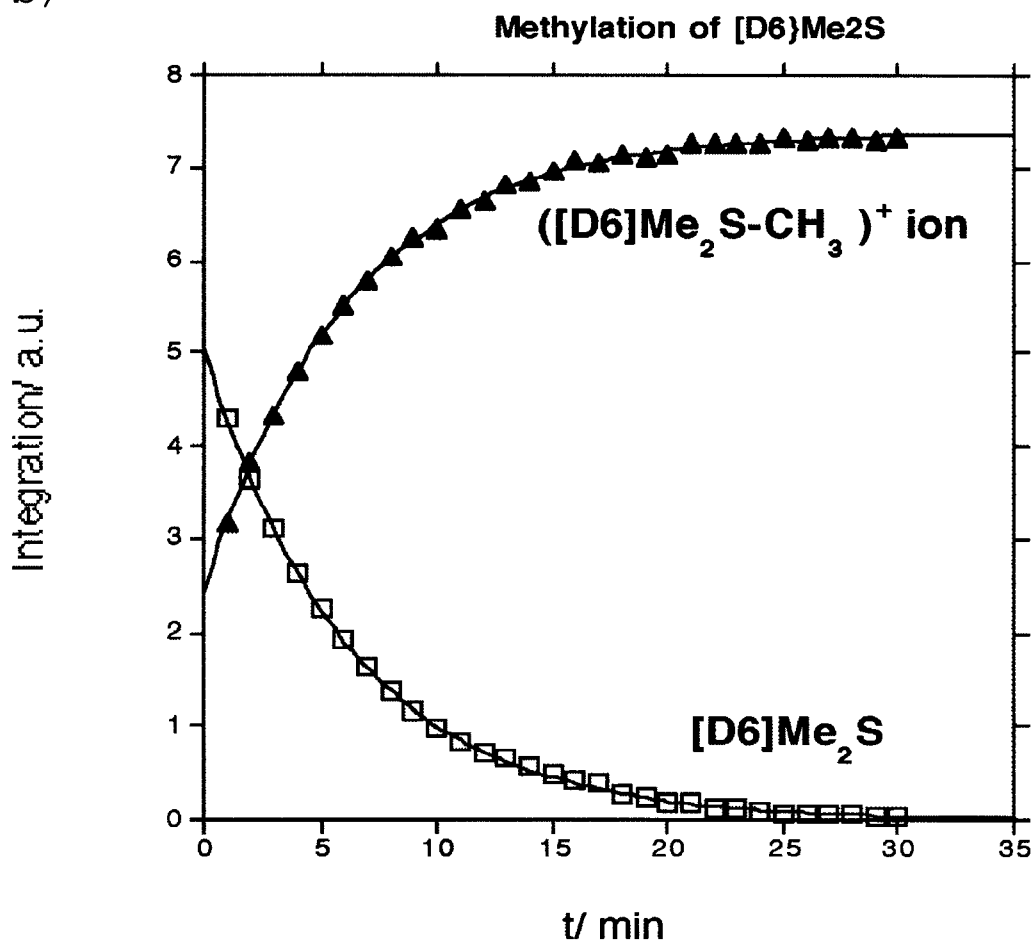

Fig S6. Methylation of [D6]Me<sub>2</sub>S in [Emim]BF<sub>4</sub>.  
 Conditions: [CH<sub>3</sub>I] = 1.0 M and [d<sub>6</sub>-Me<sub>2</sub>S] = 0.10 M at T = 298 K.
